# Supplementary material
Source: Elsevier journal article supplement (https://www.sciencedirect.com/science/article/pii/S0001651919300925)
Supplement: mmc1 [file S0001651919300925:mmc1.pdf]

# DOCUMENTO DE CONSENSO SEORL CCC–SEEN SOBRE HIPOPARATIROIDISMO POST-TIROIDECTOMÍA

---

Con el aval científico de:

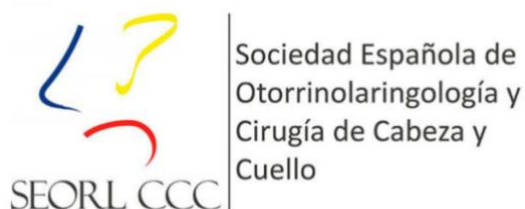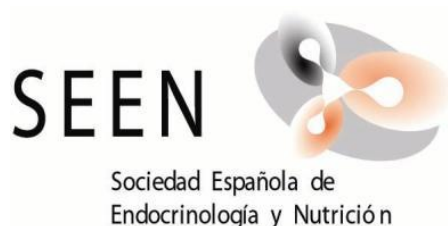

## AUTORES

| SEORL CCC                                                                                                                                                                                                                                                             | SEEN                                                                                                                                                                                                                                                             |
|-----------------------------------------------------------------------------------------------------------------------------------------------------------------------------------------------------------------------------------------------------------------------|------------------------------------------------------------------------------------------------------------------------------------------------------------------------------------------------------------------------------------------------------------------|
| <ul style="list-style-type: none"><li>Alejandro Castro<br/>Hospital Universitario La Paz<br/>Madrid</li><li>Pablo Parente<br/>Hospital Universitario Lucus Augusti<br/>Lugo</li><li>Elisa Gil Carcedo<br/>Hospital Universitario Río Hortega<br/>Valladolid</li></ul> | <ul style="list-style-type: none"><li>Amelia Oleaga<br/>Hospital Universitario de Basurto<br/>Bilbao</li><li>Miguel Paja<br/>Hospital Universitario de Basurto<br/>Bilbao</li><li>Cristina Álvarez Escolá<br/>Hospital Universitario La Paz<br/>Madrid</li></ul> |

## CORRESPONDENCIA

Alejandro Castro Calvo  
Servicio de ORL. Hospital Universitario La Paz  
Paseo de la Castellana 261 (28046, Madrid)  
Email: [alejandro.castroc@salud.madrid.org](mailto:alejandro.castroc@salud.madrid.org)

## RESUMEN

El hipoparatiroidismo es la complicación más frecuente tras tiroidectomía total. Se define por la presencia de hipocalcemia con unos niveles de hormona paratiroidea (PTH) bajos o inadecuadamente normales. La hipocalcemia aguda es una complicación potencialmente grave. Su tratamiento se basa, según la gravedad del cuadro, en la administración de calcio por vía oral o intravenosa, pudiendo requerir asimismo calcitriol oral. El riesgo de hipocalcemia sintomática tras una tiroidectomía es muy bajo si la PTH postoperatoria desciende menos del 80% respecto de la preoperatoria. Estos pacientes podrían ser dados de alta sin tratamiento, aunque los umbrales son variables entre laboratorios y recomendamos extremar la vigilancia en casos de riesgo aumentado (enfermedad de Graves, grandes bocios, reintervenciones o constancia de la extirpación de alguna paratiroides). El tratamiento a largo plazo, busca controlar los síntomas manteniendo la calcemia en el límite bajo de la normalidad, vigilando el producto calcio-fósforo y la aparición de hipercalcemia.

## ÍNDICE

|                                                                             |    |
|-----------------------------------------------------------------------------|----|
| <b>Introducción</b> .....                                                   | 4  |
| <b>Definición y Prevalencia</b> .....                                       | 4  |
| <b>Factores predisponentes y Recomendaciones preoperatorias</b> .....       | 8  |
| Factores que favorecen el hipoparatiroidismo post-tiroidectomía.....        | 8  |
| Recomendaciones preoperatorias .....                                        | 12 |
| <b>Manejo intraoperatorio de las glándulas paratiroides</b> .....           | 12 |
| Maniobras sin suficiente evidencia para su recomendación .....              | 14 |
| <b>Manejo en el postoperatorio inmediato</b> .....                          | 15 |
| Clínica del hipoparatiroidismo post-tiroidectomía .....                     | 15 |
| Predicción de la necesidad de tratamiento y opciones para alta precoz ..... | 17 |
| Tratamiento agudo de la hipocalcemia post-tiroidectomía.....                | 21 |
| <b>Manejo a largo plazo del hipoparatiroidismo post-tiroidectomía</b> ..... | 25 |
| Recuperación de la función paratiroidea .....                               | 25 |
| Tratamiento del hipoparatiroidismo post-tiroidectomía crónico .....         | 26 |
| Seguimiento de la enfermedad .....                                          | 29 |
| Complicaciones crónicas .....                                               | 31 |
| <b>Bibliografía</b> .....                                                   | 32 |
| <b>Apéndice: Resumen de Recomendaciones</b> .....                           | 38 |

## INTRODUCCIÓN

El hipoparatiroidismo (hipoPTH) es la complicación más frecuente después de una tiroidectomía total realizada en uno o en dos tiempos. A pesar de ser una complicación quirúrgica, su tratamiento inmediato implica en numerosas ocasiones a los servicios de Endocrinología, y su manejo a largo plazo recae fundamentalmente sobre el endocrinólogo. Por este motivo, la Sociedad Española de Otorrinolaringología y Cirugía de Cabeza y Cuello (SEORL CCC) y la Sociedad Española de Endocrinología y Nutrición (SEEN) han decidido elaborar un documento de consenso conjunto que aborde los aspectos más importantes de esta patología.

## DEFINICIÓN Y PREVALENCIA

Se denomina hipoparatiroidismo a la situación clínica en la cual se desarrolla una hipocalcemia como consecuencia de una insuficiente secreción de PTH. La causa más frecuente de hipoPTH es la iatrogenia, generalmente producida por cirugía tiroidea o paratiroidea. La lesión paratiroidea durante la tiroidectomía puede deberse a la extirpación inadvertida de las glándulas paratiroides, a la coagulación accidental de las mismas durante el control de las hemorragias o a la alteración de su vascularización.<sup>1</sup>

La mayoría de los endocrinólogos definen el hipoPTH post-tiroidectomía (hipoPTH-PT) como la presencia tras cirugía tiroidea de hipocalcemia (calcio sérico <2.0mmol/L ó <8.0 mg/dl) con una concentración inadecuada de los niveles de PTH intacta (PTHi), bien francamente bajos o inapropiadamente normales (habitualmente por debajo de 15 ng/l, teniendo en cuenta que este valor puede variar dependiendo de los niveles de referencia para cada laboratorio).<sup>2</sup>

El hipoPTH-PT puede ser transitorio o permanente. La European Society of Endocrinology (ESE) y la American Thyroid Association (ATA) definen el hipoPTH permanente como la presencia de hipocalcemia y niveles de PTH inapropiadamente bajos, o la necesidad de tratamiento, 6 meses tras la cirugía tiroidea.<sup>3,4</sup> Sin embargo, tanto la Endocrine Society como otros grupos consideran el hipoPTH permanente a partir de los 12 meses de duración.<sup>5</sup> El principal motivo para considerar un tiempo mayor se debe a la recuperación de la función paratiroidea observada en un porcentaje importante de pacientes entre los 6 y los 12 meses tras la cirugía. La prevalencia del hipoPTH-PT permanente varía del 0,12% al 16,2% según las diferentes series publicadas. La prevalencia para el hipoPTH transitorio oscila entre el 10% y el 40%.<sup>2-5</sup> Esta variación es debida en gran parte a la falta de consenso en sus definiciones, que produce amplias oscilaciones en la misma cohorte de pacientes según la definición que se utilice.<sup>6</sup>

En trabajos publicados en los últimos años, se definen los síndromes de hipoPTH de una forma más clínica como: transitorio, prolongado y permanente. El hipoPTH transitorio se resuelve generalmente en el primer mes tras la cirugía; el hipoPTH prolongado cuando tiene una duración entre 1 y 12 meses; y permanente aquel que perdura durante más de 12 meses.<sup>7</sup>

La consecuencia del hipoPTH-PT es la hipocalcemia, definida como una concentración de calcio iónico ( $\text{Ca}^{2+}$ ) por debajo del límite inferior del rango de normalidad. El  $\text{Ca}^{2+}$  supone aproximadamente el 50% del calcio total ( $\text{CaT}$ ); el resto del calcio se encuentra unido a proteínas (sobre todo a la albúmina) o formando complejos

unido a aniones como el fosfato. Para valorar el grado de hipocalcemia debe utilizarse el calcio corregido, que puede estimarse utilizando la siguiente fórmula<sup>8</sup>:

$$\text{Calcio corregido} = \text{CaT mg/dL} + [0,8 \times (4,0 - \text{albúmina g/dL})]$$

Cuando no se disponga de albúmina, puede corregirse el calcio utilizando el valor de proteínas totales mediante la fórmula:

$$\text{Calcio corregido} = \text{CaT mg/dL} - (\text{proteínas totales g/dL} \times 0,676) + 4,87$$

Existe controversia acerca de lo que se considera hipocalcemia postquirúrgica. Algunos autores basan la definición en determinaciones bioquímicas, cuando la concentración de CaT o Ca<sup>2+</sup> se sitúa por debajo de un determinado umbral. El umbral por debajo del cual se considera hipocalcemia varía según los autores entre 7,5 mg/dL y 8,5 mg/dL de CaT, aunque lo más habitual es considerar un CaT <8 mg/dL (2 mmol/L) o un Ca<sup>2+</sup> <4 mg/dL (<1 mmol/L)<sup>9-10</sup>. Sin embargo, hasta un 50-87% de los pacientes pueden desarrollar una hipocalcemia bioquímica moderada que se autolimita en unos días sin necesidad de tratamiento y nunca llegan a presentar síntomas.

Existe clara evidencia de que la correlación entre hipocalcemia bioquímica y clínica no es tan exacta como cabría esperar. Los niveles de calcio sérico a partir de los cuáles aparecen los síntomas de hipocalcemia no son uniformes entre distintos pacientes ni para el mismo paciente, sino que también influyen otros factores como la velocidad de instauración de la hipocalcemia.<sup>9</sup> En la clínica diaria observamos diferentes situaciones,<sup>4</sup> como la hipocalcemia bioquímica asintomática, que se ha descrito en las primeras horas tras cirugías no tiroideas, probablemente por la hemodilución debida a la sueroterapia intra y postoperatoria. Estos pacientes nunca

desarrollan clínica y no necesitan tratamiento. Por eso, algunos pacientes con hipocalcemia bioquímica tras una tiroidectomía pueden pertenecer a este grupo de hipocalcemias de causa multifactorial y no debidas a lesión paratiroidea,<sup>10</sup> y no se debieran incluir dentro de los pacientes con hipoPTH-PT. En el otro extremo de la realidad nos encontramos con el hipoPTH relativo, definido como la presencia de clínica de hipocalcemia que precisaría de tratamiento a pesar de la normalidad de las determinaciones de laboratorio. Por lo tanto, es la clínica es la que determina la necesidad de tratamiento y define la existencia de enfermedad, por encima de valores bioquímicos que pueden estar sometidos a errores o a la variabilidad inherente en los rangos de normalidad.

A los niveles de hipocalcemia se debe añadir una concentración inadecuada de los niveles de PTH. Se ha demostrado que tanto los niveles séricos de PTH como la capacidad de respuesta de la PTH a estímulos hipocalcémicos (infusión de bicarbonato sódico) se encuentran disminuidos en un porcentaje elevado de pacientes normocalcémicos a las 48 horas de una tiroidectomía total, confirmando así la existencia de un hipoPTH-PT subclínico. Por este motivo, muchos autores<sup>2,5,8</sup> proponen una definición más clínica, sin determinar unos niveles de calcemia concretos, sino considerando como hipoPTH-PT a la necesidad de suplementos de calcio tras una cirugía tiroidea, bien para tratar una hipocalcemia sintomática, o bien por un descenso progresivo de los niveles de calcio sérico que hace probable el desarrollo de sintomatología.

Sin embargo, es bien conocido que la hipocalcemia sintomática puede desarrollarse hasta 72 horas tras una tiroidectomía. Para evitar hospitalizaciones

prolongadas innecesarias, planteamos un protocolo de actuación que nos ayude a predecir la hipocalcemia sintomática y así evitar complicaciones o reingresos de los pacientes con una clínica potencialmente grave.

## FACTORES PREDISPONENTES Y RECOMENDACIONES PREOPERATORIAS

### Factores que favorecen el hipoparatiroidismo post-tiroidectomía

La falta de consenso para definir el hipoPTH-PT dificulta la interpretación de las numerosas publicaciones sobre los factores predisponentes para su aparición.

En líneas generales, se pueden clasificar estos factores predisponentes en dos grupos: los predictores de hipoPTH transitorio y los que se asocian a mayor riesgo de hipoPTH permanente.<sup>11</sup>

En las revisiones más recientes<sup>1</sup> se establece otra categorización diagnóstica para estos predictores, dividiéndolos en bioquímicos, quirúrgicos, relacionados con el paciente y relacionados con la enfermedad que motiva la intervención. Si adoptamos esta clasificación, las evidencias publicadas actualmente se pueden desglosar de la siguiente manera:

#### Factores predictores bioquímicos

**Calcemia preoperatoria:** algunos autores han encontrado asociación entre calcemias más bajas y la presencia y severidad del hipoPTH-PT. Una calcemia preoperatoria  $\leq 9,1$  mg/dl (2,27 mmol/l) mostraba una sensibilidad del 29–58% como predictor de hipoPTH-PT transitorio en dos publicaciones,<sup>12,13</sup> pero un reciente metanálisis que incluyó 2.493 cirugías cuestiona esta asociación,<sup>1</sup> que además pierde su significación al ajustar por los niveles de vitamina D en los trabajos donde se

postulaba. Alguna publicación apoya un mayor valor predictivo cuando se determina el calcio iónico respecto al total, pero con escaso número de cirugías.<sup>14</sup> Ningún trabajo lo asocia con un mayor riesgo de hipoPTH-PT permanente.

**25-hidroxi vitamina D:** varios estudios<sup>1,15,16</sup> han demostrado la asociación de valores bajos de esta vitamina con un mayor riesgo de hipoPTH-PT transitorio. Esta asociación no aparece en todos los trabajos publicados, y tampoco el umbral elegido, generalmente por debajo de 62 nmol/l (25 ng/ml), lo que impide consensuar protocolos al respecto.

**PTH intacta:** el nivel preoperatorio más elevado, potencial marcador de la deficiencia de vitamina D, solo ha demostrado asociación con un mayor riesgo de hipoPTH-PT transitorio en la tiroidectomía por enfermedad de Graves.<sup>17</sup> Su evaluación perioperatoria se emplea en muchos centros para evaluar el riesgo de hipoPTH-PT, como veremos más adelante.

**Otros:** las cifras elevadas de fosfatasa alcalina, asociadas al hipertiroidismo severo y al hiperparatiroidismo, son marcadores de mayor recambio óseo y por ello pueden asociarse a fenómenos de hueso hambriento postoperatorio, con mayor riesgo de hipoPTH-PT transitorio. Su valor como predictor es nulo fuera de este contexto.

#### Factores predictores quirúrgicos

**Experiencia:** el conocimiento anatómico detallado y la experiencia en la práctica de tiroidectomías, cifrada en la realización de 40-50 intervenciones anuales, son factores que han demostrado conseguir una menor tasa de hipoPTH-PT.<sup>18</sup> Sin embargo, un estudio multicéntrico de 2003 no encontraba diferencias en las tasas de

hipoPTH-PT transitorio ni permanente cuando comparaba las intervenciones realizadas por cirujanos que realizaban menos de 10 anuales con las practicadas por cirujanos con 10-50 o más de 50 anuales.<sup>19</sup>

**Paratiroidectomía inadvertida:** incrementa el riesgo de hipoPTH-PT transitorio, con una OR de 1,9 en un metaanálisis de 1.982 pacientes.<sup>20</sup> Se ha propuesto un “score” (4 - paratiroides en la pieza quirúrgica - paratiroides autotrasplantadas) que en estudios prospectivos ha demostrado una sólida correlación inversa con el riesgo de hipoPTH-PT transitorio y permanente.<sup>21</sup> El inconveniente de este dato es que usualmente su conocimiento en el informe patológico es tardío, después del alta hospitalaria.

**Duración de la intervención:** las intervenciones más prolongadas se asocian a una mayor tasa de hipoPTH-PT transitorio,<sup>22</sup> así como las reintervenciones por sangrado y las segundas cirugías por recidiva.<sup>23</sup>

La influencia de la identificación de las paratiroides y su manejo intraoperatorio, así como la influencia de la disección del compartimento central y la técnica quirúrgica empleada son analizados en detalle en el siguiente apartado.

#### Factores predictores asociados con el paciente

**Sexo:** se ha relacionado el menor tamaño del campo quirúrgico y la mayor prevalencia de déficit de vitamina D con una mayor incidencia de hipoPTH-PT transitorio, hasta dos veces más, en tiroidectomías realizadas a mujeres respecto a hombres.<sup>24</sup>

**Edad:** ha habido mucha discrepancia, e inicialmente se encontró que la edad más avanzada era un predictor de mayor riesgo,<sup>15</sup> pero en estudios recientes no se ha encontrado esta asociación, e incluso se ha probado la relación inversa,<sup>22</sup> por lo que no se considera un factor relevante.

#### Factores predictores asociados con la enfermedad

**Enfermedad de Graves:** se asocia con un mayor riesgo de hipoPTH-PT, tanto transitorio como permanente. Se ha atribuido al incremento del recambio óseo presente en el hipertiroidismo, pero la mayor vascularización de la glándula y los fenómenos inflamatorios también aumentan el riesgo de daño paratiroideo.

**Peso del espécimen:** ha demostrado ser en algunos estudios un factor predictor de hipoPTH-PT, tanto transitorio<sup>25</sup> como permanente.<sup>22</sup> Muy probablemente sea un predictor ligado a la mayor duración de la intervención y la mayor manipulación quirúrgica de la glándula.

**Extensión retroesternal:** en consonancia con el factor anterior, por la mayor duración y laboriosidad de la intervención.<sup>26</sup>

**Reintervención:** la fibrosis resultante de la intervención previa eleva el riesgo de dañar las paratiroides o su vascularización durante la cirugía.<sup>23</sup>

**Malignidad:** un estudio reciente asocia el riesgo de hipoPTH-PT con la cirugía tiroidea por malignidad,<sup>27</sup> independientemente de la realización de disección central, aunque estudios previos no habían evidenciado esta asociación si la extensión de la tiroidectomía era igual.

## Recomendaciones preoperatorias

Posiblemente la recomendación más importante sea que la cirugía la realice un equipo experimentado y con un volumen quirúrgico elevado.

Parece razonable evaluar los niveles de vitamina D y PTH con la finalidad de reponer preoperatoriamente los niveles de vitamina D en los pacientes deficientes con cirugía electiva,<sup>4</sup> aunque faltan evidencias que apoyen esta recomendación y no hay una concentración límite que haya demostrado beneficio.

Es conveniente estrechar el control postoperatorio en aquellos casos con alguno de los factores predisponentes descritos, en particular mujeres con enfermedad de Graves y elevación de la fosfatasa alcalina, los bocios grandes con extensión intratorácica, las reintervenciones y aquellas cirugías donde haya constancia de la extirpación de alguna o algunas glándulas paratiroides.

## MANEJO INTRAOPERATORIO DE LAS GLÁNDULAS PARATIROIDES

El factor fundamental para la prevención del hipoPTH-PT es una cirugía adecuada. Para ello se requiere conocimiento anatómico de la localización y vascularización de las glándulas paratiroides,<sup>28</sup> experiencia en cirugía tiroidea, y disección cuidadosa, incluyendo sistemas de magnificación cuando sea preciso.<sup>29</sup>

Para evitar la lesión de las glándulas paratiroides, es necesario realizar una búsqueda específica de las mismas durante la disección subcapsular del tiroides, con el fin de identificar la glándula y su vascularización.<sup>30</sup> La glándula se identifica por su color (marrón-salmón), forma (delgada y elíptica), consistencia (blanda), presencia de hilo vascular y movimiento deslizante intracapsular:

- Paratiroides inferior: se recomienda identificarla al disecar el polo inferior, antes de ligar las venas inferiores, ya que se encuentra alrededor de un centímetro lateral o posterior al polo inferior y en un plano anterior al plano coronal del nervio. La vascularización proviene de la arteria tiroidea inferior o del tiroides.
- Paratiroides superior: se recomienda realizar la búsqueda tras la identificación del nervio laríngeo recurrente, encontrándose a menos de un centímetro, lateral a la articulación cricoaritenoides y craneal a la intersección del nervio recurrente con la arteria tiroidea inferior, posterior al plano coronal en el que se encuentra el nervio. Puede estar irrigada a través de la arteria tiroidea inferior, de la superior, de una rama anastomótica de ambas o del propio tiroides.<sup>31</sup>

Si no se logra la identificación en un tiempo razonable, es más adecuado abandonar la búsqueda y ceñirse a la disección subcapsular, dado que una disección excesiva, aunque aumente el número de glándulas identificadas, aumenta también el riesgo de lesión sobre la vascularización y, por lo tanto, el riesgo de hipoPTH.<sup>32</sup>

Tan importante como la identificación de las glándulas es la preservación de su aporte arterial y drenaje venoso. Para ello, se recomienda localizar el origen del aporte vascular y preservar sin disecar la grasa situada entre la glándula y el origen de la vascularización. Otras maniobras, como ligar el tronco de la arteria no ha demostrado que incremente la aparición de hipoPTH-PT.<sup>33</sup> La lesión directa de la glándula o de su vascularización provoca el oscurecimiento de su aspecto, aunque, debemos recordar que el color de la glándula tras la disección no permite predecir su funcionamiento.

En caso de lesión evidente o duda sobre la funcionalidad de la paratiroides, se recomienda reimplantarla. No se ha demostrado disminución del hipoPTH (transitorio o permanente) reimplantando siempre una glándula. La técnica del reimplante, previa confirmación histológica intraoperatoria, consiste en fragmentar la glándula (en fragmentos de unos 0,5 mm) y colocarla en 2 ó 3 bolsillos exangües en un musculo de la zona (generalmente el esternocleidomastoideo), cerrando con puntos no reabsorbibles.<sup>34</sup> De la misma manera, se recomienda la revisión de la pieza quirúrgica en el caso de que no se identifiquen todas las glándulas, para reimplantar aquellas que se hayan extirpado inadvertidamente.<sup>35</sup>

En la realización del vaciamiento central del cuello, específicamente en la disección paratraqueal, las glándulas paratiroides (sobre todo las inferiores) tienen un riesgo mayor de lesión que en la cirugía tiroidea habitual, siendo el riesgo de hipoPTH permanente y transitorio mayor.<sup>36</sup> Las recomendaciones en la disección no difieren de las previamente expuestas y, en los casos sin adenopatías clínicamente evidentes, una cirugía cuidadosa puede preservar las glándulas funcionantes. Sin embargo, la presencia de adenopatías dificulta la disección y se incrementa el riesgo de hipoPTH y el riesgo de recidiva al intentar preservar tejido alrededor de la glándula. Por ello, si la glándula está en relación con adenopatías, se recomienda la exéresis y reimplante, ya que se reduce el hipoPTH definitivo y la recurrencia.<sup>37</sup>

### **Maniobras sin suficiente evidencia para su recomendación**

Aunque algunos autores hayan publicado una reducción de la aparición de hipoPTH con el uso de sistemas de coagulación mediante ultrasonidos<sup>38</sup> o sellado bipolar, con el uso de sonda de gammagrafía<sup>39</sup> o mediante autofluorescencia,<sup>40</sup> no hemos

encontrado suficiente evidencia que permita recomendar su uso.<sup>24</sup> Otros estudios han reflejado un descenso del hipoPTH transitorio con la realización de técnicas subtotales, sin embargo, no podemos recomendar el cambio de la indicación quirúrgica por éste motivo.<sup>24</sup> Por otra parte, las técnicas endoscópicas (Minimally Invasive Video-Assisted Thyroidectomy, MIVAT) o robóticas tampoco han demostrado disminuir la aparición de hipoPTH-PT.<sup>41</sup>

## MANEJO EN EL POSTOPERATORIO INMEDIATO

### Clínica del hipoparatiroidismo post-tiroidectomía

Tras una tiroidectomía, la hipocalcemia por hipoPTH puede ocurrir de forma aguda y convertirse en una verdadera urgencia médica. La hipocalcemia puede alterar las funciones neurológica, cognitiva, muscular y cardíaca.<sup>42-44</sup>

La clínica de la hipocalcemia aguda se debe a que el potencial de membrana umbral se acerca al potencial de reposo, lo que origina una hiperexcitabilidad sensitiva y motora.<sup>45</sup> Comienza con parestesias alrededor de la boca o en las zonas acras y progresa hacia espasmos musculares, típicamente el espasmo carpopedal (tetania hipocalcémica). La conducción miocárdica puede verse afectada produciéndose un alargamiento del intervalo QT y, finalmente, alteración de la contractilidad y fallo cardíaco.<sup>46</sup> También pueden aparecer fenómenos de broncospasmo y laringospasmo, convulsiones y alteración del nivel de conciencia. El resultado es fatal si no se corrige a tiempo.

El hipoPTH-PT agudo se caracteriza por una caída rápida de los niveles de PTH con un punto más bajo a las tres horas de la cirugía. La hipocalcemia habitualmente

ocurre en el primer día con un nadir en los niveles de calcio a los tres días.<sup>47</sup> Habitualmente el cuadro comienza con parestesias que progresan en unas horas hacia la tetania, pero en ocasiones debuta como una tetania franca y rápidamente progresiva. Ante la sospecha clínica se debe instaurar tratamiento sin esperar la confirmación bioquímica. En aquellos pacientes que únicamente presenten parestesias y que no se aprecien espasmos musculares, los signos de Chvostek y de Trousseau nos pueden confirmar la existencia de una tetania latente.

El signo de Chvostek consiste en la percusión del nervio facial en un área unos 0,5 cm por debajo del arco cigomático y unos 2 cm por delante del pabellón auricular.<sup>46</sup> Se considera positivo cuando se aprecia un espasmo de los músculos faciales, que puede oscilar desde una pequeña contracción del labio superior hasta un espasmo completo de toda la hemicara. El signo de Trousseau se considera positivo cuando aparece un espasmo carpopedal en el brazo en el que se mantiene inflado un esfigmomanómetro 20 mm Hg por encima de la presión arterial sistólica durante al menos 3 minutos.<sup>46</sup> El signo de Chvostek puede ser positivo en un 10% de pacientes normocalcémicos, y estar ausente en un 30% de los que presentan hipocalcemia, mientras que el signo de Trousseau es más sensible y específico, apareciendo en el 95% de los pacientes hipocalcémicos y en sólo un 1 % de los normocalcémicos.<sup>46</sup> Algunos de los factores que se han relacionado con la positividad de los signos de Chvostek y Trousseau en pacientes normocalcémicos son la deficiencia de magnesio,<sup>48</sup> la hipoglucemia<sup>49</sup> o la disfunción de la formación reticular del tronco encefálico ajena a desequilibrios iónicos.<sup>50</sup>

La severidad de los síntomas depende del nivel de calcio, de la velocidad de instauración y de la variabilidad individual.<sup>8</sup>

### Predicción de la necesidad de tratamiento y opciones para alta precoz

El retraso en la aparición de los síntomas de hipocalcemia y la potencial gravedad del cuadro si no se trata con celeridad obliga a mantener ingresados a los pacientes hasta tener la seguridad de que no van a desarrollar un cuadro de tetania en su domicilio. Históricamente, el ingreso se prolongaba durante al menos 48 horas, monitorizando las calcemias y la clínica, para tratar a los pacientes que desarrollaran síntomas y dar de alta a aquellos cuya calcemia se estabilizaba.<sup>4,51-53</sup> Se trata de una estrategia económicamente costosa que obliga a mantener hospitalizados a un porcentaje elevado de pacientes que no va a desarrollar clínica ni a precisar tratamiento.

Por este motivo, se han desarrollado otros métodos que pretenden acortar el ingreso hospitalario, reduciendo así los costes de la tiroidectomía. Estos procedimientos se pueden clasificar en dos grandes grupos: aquellos que proponen el tratamiento rutinario de todos los pacientes intervenidos y aquellos que tratan de predecir qué pacientes van a necesitar tratamiento mediante distintas determinaciones bioquímicas obtenidas en las primeras horas de postoperatorio.

### Tratamiento rutinario con suplementos

Diversos estudios comparan grupos de pacientes que reciben tratamiento según la clínica o la calcemia con grupos que son tratados de forma rutinaria desde las horas siguientes a la cirugía con dosis variables de suplementos de calcio y vitamina D.<sup>54-57</sup> La mayor parte de estos trabajos concluyen que los suplementos rutinarios disminuyen la

aparición de síntomas de hipocalcemia y la necesidad de tratamiento intravenoso. Estos resultados han sido confirmados en recientes metaanálisis.<sup>58,59</sup>

Sin embargo, esta estrategia presenta varios inconvenientes. Por una parte, no elimina completamente el riesgo de sufrir una hipocalcemia sintomática severa en el domicilio.<sup>57,58</sup> Por otra parte, se administra un tratamiento que una mayoría de pacientes no necesita, especialmente en el caso de cirujanos con una baja incidencia de hipoPTH. Los suplementos orales de calcio no están exentos de efectos adversos y generan con frecuencia molestias gastrointestinales, además del riesgo de hipercalcemia e hipercalciuria al tratar con calcio y vitamina D a pacientes no hipoparatiroides. Por último, el tratamiento con calcio y vitamina D puede retrasar la recuperación del hipoPTH-PT.

#### Predicción de la necesidad de tratamiento

Se han utilizado diferentes parámetros bioquímicos para seleccionar a aquellos pacientes que necesitan tratamiento para prevenir el desarrollo de hipocalcemia tras una tiroidectomía. Las determinaciones más empleadas son la pendiente de la calcemia en las primeras horas tras la cirugía o distintas variables basadas en los niveles de PTH.<sup>1</sup> Éstas últimas han demostrado ser el predictor más fiable, lo cual es consistente con el hecho de que la hipocalcemia postquirúrgica se debe principalmente a hipoPTH.<sup>4</sup> Desde el punto de vista económico, la predicción del riesgo de hipocalcemia con determinaciones precoces de PTH ha demostrado ahorrar costes gracias a la reducción del tiempo de ingreso.<sup>60,61</sup> Sin embargo, no existe consenso ni sobre el momento de extracción de la muestra (intraoperatoria vs diferida entre 10 min y 24 horas tras la intervención), ni sobre el tipo de variable a emplear (determinación única de PTH

postoperatoria vs comparación de niveles pre-postoperatorios), ni sobre los puntos de corte a emplear para decidir el alta o el inicio de tratamiento.<sup>1,62-64</sup> Recientemente, la ATA ha publicado un documento en el que sugiere que una PTH postoperatoria  $\geq 15$  pg/mL medida a partir de los 20 minutos de la intervención puede ser suficiente para evitar la suplementación con calcio y la monitorización, si bien dejan claro que los valores de referencia pueden variar en las distintas instituciones.<sup>4</sup>

### Recomendaciones del consenso

Basándonos en los datos existentes en la literatura, recomendamos:

- Emplear la PTH para predecir la necesidad de tratamiento tras una tiroidectomía.
- Comparar los valores de PTH postoperatorios con los preoperatorios, ya que favorece que se anule la influencia de otros factores que pueden afectar al nivel de PTH.
- Pensamos que el momento de extracción de la muestra no es determinante, aunque se prefiere que se realice unos minutos-horas tras la cirugía. En cambio, es imprescindible que ésta se procese correctamente (traslado rápido al laboratorio y centrifugado), ya que la PTH es una molécula muy lábil y un procesamiento inadecuado o diferido de la muestra puede ser causa de imprecisiones en la determinación.

Sin embargo, carecemos de suficientes evidencias como para poder recomendar un protocolo o unos puntos de corte concretos que sean generalizables para todos los hospitales. Utilizando como base estudios realizados en el Hospital Universitario La

Paz<sup>65,66</sup>, que han demostrado su seguridad en más de 500 pacientes y un ahorro potencial de unos 870€ por intervención, recomendamos establecer dos puntos de corte que clasifiquen a los pacientes en tres grupos de riesgo para desarrollar clínica de hipocalcemia (riesgo muy bajo – riesgo intermedio – riesgo muy alto) y que se detallan en la tabla 1. En cualquier caso, hay que tener en cuenta que toda determinación analítica esta sujeta a posibles errores y a variabilidad interindividual, por lo que recomendamos que antes del alta se instruya a los pacientes sobre los síntomas de hipocalcemia y sobre la actitud que deben adoptar si aparecen (autoadministración de calcio oral y acudir a urgencias), así como extremar la vigilancia en aquellos casos con factores predisponentes o determinaciones analíticas próximas al umbral.

**Tabla 1:** Estratificación en grupos de riesgo para hipoPTH-PT sintomático según los puntos de corte determinados en los estudios del Hospital Universitario La Paz.<sup>65</sup>

|                                                         | PROBABILIDAD DE<br>HIPOCALCEMIA CLÍNICA | ACTITUD                                                                                                      |
|---------------------------------------------------------|-----------------------------------------|--------------------------------------------------------------------------------------------------------------|
| <b>Dism PTHi ≤ 80%</b>                                  | Riesgo muy bajo<br>(0-4%)               | Alta con recomendaciones<br>Considerar vigilancia si factores predisponentes<br>o valores próximos al umbral |
| <b>Dism PTHi &gt; 80%<br/>y<br/>PTHi post ≥ 3 pg/mL</b> | Riesgo intermedio<br>(15-75%)           | Considerar calcio oral 2 – 2 – 2<br>Considerar calcitriol 0,25 mcg/24h<br>Monitorizar                        |
| <b>PTHi post &lt; 3 pg/mL</b>                           | Riesgo muy alto<br>(90-100%)            | Iniciar calcio oral 2 – 2 – 2<br>Iniciar calcitriol 0,25-0,5 mcg/24h<br>Monitorizar                          |

$$\text{DismPTHi} = [ (\text{PTH}_{\text{post}} - \text{PTH}_{\text{pre}}) / \text{PTH}_{\text{pre}} ] \times 100$$

PTHi < 3 pg/mL implica PTH intacta indetectable

Monitorizar = vigilancia de clínica y calcemias cada 12-24 h, para valorar ajuste de dosis de calcio y/o calcitriol

## Tratamiento agudo de la hipocalcemia post-tiroidectomía

La meta del tratamiento del hipoPTH-PT es controlar los síntomas y evitar complicaciones graves. Dado que la hipocalcemia estimula la proliferación de las células paratiroides y la recuperación del hipoPTH, el objetivo debe ser mantener la calcemia en el rango bajo de la normalidad.<sup>46,51</sup> Para el tratamiento del cuadro agudo de hipocalcemia se emplean fundamentalmente suplementos de calcio y de vitamina D.

### Suplementos de calcio

Los suplementos de calcio se pueden administrar de forma oral o intravenosa. Ésta última vía consigue una mayor rapidez de acción y es la indicada en aquellos pacientes que desarrollan síntomas de hipocalcemia, especialmente si ya han aparecido signos de tetania franca. Los preparados de gluconato cálcico son preferibles a los de cloruro cálcico para su administración intravenosa por vía periférica, por el menor riesgo de necrosis tisular en caso de extravasación.<sup>46</sup> Puede administrarse en bolo o en forma de perfusión continua. Los efectos del calcio intravenoso no duran más de 2 horas una vez finalizada la infusión, por lo que siempre que se instaure tratamiento intravenoso se deben pautar al mismo tiempo suplementos de calcio oral que mantengan la calcemia a más largo plazo.

Existen diferentes formulaciones para la administración de calcio oral. El carbonato cálcico es la que contiene mayor proporción de calcio elemento (40%), aunque requiere de ambiente ácido para su absorción, por lo que se recomienda su administración junto con las comidas. La absorción de otros preparados, como el citrato cálcico, no se altera con el pH gástrico, por lo que son más idóneos para pacientes con

aclorhidria o tratados con inhibidores de la bomba de protones.<sup>46</sup> Sin embargo, en España no disponemos de este preparado.

### Suplementos de vitamina D

Los suplementos de vitamina D favorecen la absorción intestinal de calcio, al tiempo que promueven la extracción de calcio óseo. Generalmente se recomiendan cuando la calcemia esté por debajo de 7,5 mg/dL, o cuando sea imposible mantener una calcemia estable únicamente con suplementos de calcio.<sup>46,67</sup> Sin embargo, hay que tener en cuenta que la vitamina D aumenta el riesgo de hipercalcemia, hipercalcemia, hipercalcemia e hiperfosfatemia, al tiempo que inhibe la síntesis de PTH y la proliferación de las células paratiroides con lo que puede retrasar la recuperación del hipoPTH.<sup>68</sup>

Existen diferentes preparados de vitamina D. En general se prefiere el calcitriol (Rocaltrol®) frente a otros precursores, ya que es la forma más activa y no requiere de hidroxilación renal, que está disminuida en el hipoPTH. La dosis inicial suele ser 0,25 µg al día, pudiendo incrementarse hasta 2 µg al día repartido en 1 ó 2 tomas. Su efecto se inicia a las 2 horas de la administración, alcanza el máximo hacia las 10 horas, y no dura más de 2-3 días, por lo que la toxicidad asociada a su administración excesiva puede revertirse en pocos días.<sup>4,46,69</sup> Tanto la vitamina D2 (ergocalciferol) como la vitamina D3 (colecalciferol) se utilizan ocasionalmente para el manejo a largo plazo dado que tienen vidas medias mas prolongadas que el calcitriol (semanas-meses).<sup>4</sup>

### Suplementos de magnesio

La hipomagnesemia leve estimula la secreción de PTH. Sin embargo, la hipomagnesemia grave la disminuye. Este bloqueo paradójico de la secreción de PTH se piensa que se debe al efecto intracelular de la depleción de magnesio en las  $\alpha$ -

subunidades de las proteínas G asociadas con el receptor del sensor de calcio (CaSR), provocando disminución de la secreción de PTH. Por otra parte, la hipomagnesemia provoca resistencia en los tejidos diana de la PTH, particularmente el túbulo renal y el hueso.<sup>2</sup>

En caso de hipocalcemia resistente al tratamiento sustitutivo con calcio y vitamina D debiera descartarse la presencia de hipomagnesemia. Si los niveles fueran inferiores a 1,6 mg/dl en un paciente con función renal normal la suplementación con magnesio puede conseguir la recuperación de los niveles de calcio y pueden también disminuir el estreñimiento que se asocia a la sustitución con dosis altas de calcio.<sup>4</sup>

La deficiencia de magnesio puede corregirse inicialmente con sulfato de magnesio intravenoso (2-4 g cada 6 a 8 horas), o utilizar por vía oral óxido de magnesio (400 a 500 mg cada 12 a 24 horas) hasta que se consiga una adecuada ingesta oral y el magnesio sérico sea mayor de 2 mg/dl.<sup>70-73</sup> Por otra parte, hay que tener en cuenta que una administración de magnesio demasiado rápida puede producir una pérdida urinaria excesiva de magnesio y de calcio.<sup>8</sup>

#### PTH recombinante humana

Existen pocos datos del uso de PTH recombinante humana (rhPTH) en pacientes con hipoPTH-PT agudo.<sup>8</sup> Se han descrito casos en los que se ha utilizado tras paratiroidectomía, tiroidectomía o trasplante renal y en un paciente con hipoPTH con miocardiopatía hipocalcémica.<sup>74-77</sup> En un estudio se administró acetato de teriparatida, una rhPTH sintética (fragmento N terminal 1-34 de la PTH nativa), a dosis de 20 µg dos veces al día por vía subcutánea, durante una semana con la posibilidad de mantenerlo

tres semanas. La hipocalcemia se eliminó completamente en las primeras 24 horas en los 8 pacientes estudiados. Además, este tratamiento redujo la estancia hospitalaria y se acompañó de una recuperación completa o parcial en los seis meses posteriores.<sup>78</sup> Además, la teriparatida puede ser útil en el tratamiento del hipoPTH-PT y en su prevención.<sup>71</sup> En un ensayo fase II (estudio THYPOS) se evaluó si su utilización pudiera prevenir la hipocalcemia aguda y acortar los días de hospitalización en sujetos con alto riesgo de hipoPTH-PT, aquellos con una PTH a las cuatro horas menor de 10 pg/ml. Se administraron 20 µg de teriparatida cada 12 horas hasta el alta consiguiendo menor riesgo de hipocalcemia, menor duración de la hospitalización y menor necesidad de suplementos de calcio y vitamina D con respecto a los pacientes en los que se había realizado seguimiento habitual.<sup>79</sup> Por otra parte no existen datos disponibles en el uso de PTH (1-34) o PTH (1-84) en el hipoPTH-PT agudo a diferencia de lo que ocurre en el hipoPTH crónico.<sup>8</sup>

#### Pautas de tratamiento

La tetania franca o la hipocalcemia grave (calcio corregido inferior a 7,5 mg/dl) debiera tratarse con calcio intravenoso: un bolo de 10 a 20 ml de gluconato cálcico al 10% (que supone 93 a 186 mg de calcio elemento) seguido por una infusión continua de gluconato cálcico a un ritmo de 1-3 mg de calcio elemento/kg de peso/h (esto aumentaría el nivel de calcio en 2-3 mg/dl); debiera asociarse asimismo calcitriol por vía oral. La hipocalcemia moderada puede tratarse con preparados de calcio por vía oral (1 a 2 g de calcio elemento tres veces al día) y calcitriol. La hipocalcemia leve ( $\text{Ca} > 8,0$  mg/dl) o la tetania latente puede tratarse con suplementos de calcio oral.<sup>3,71,72,76,77</sup> En la figura 1 se detalla un algoritmo con estas pautas.

**Figura 1:** Algoritmo para el manejo agudo de la hipocalcemia por hipoPTH-PT.

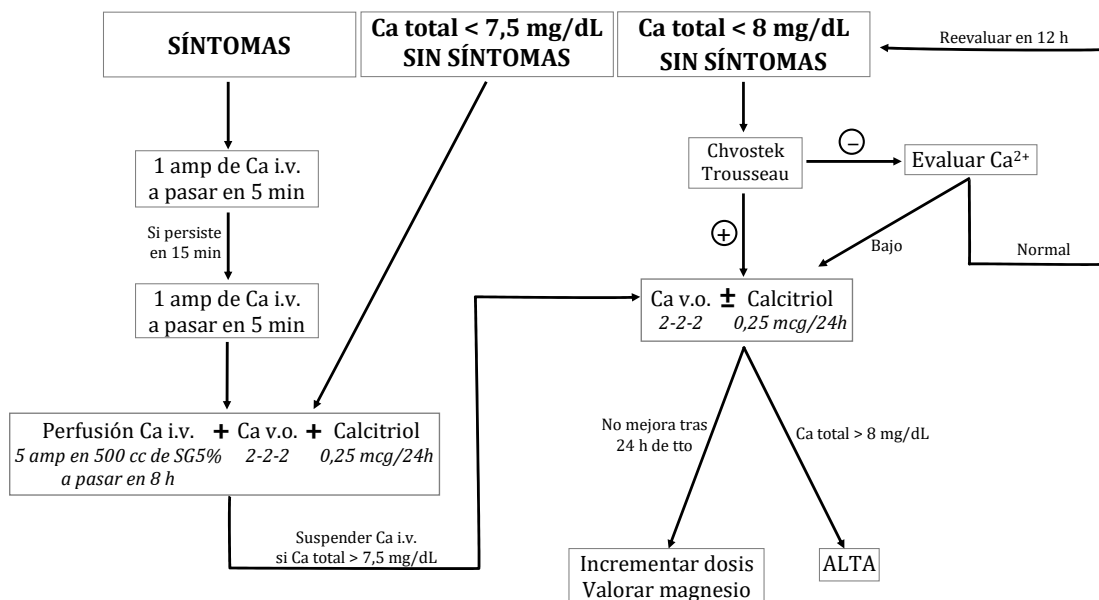

**NOTAS:**

Ca v.o.: comprimidos con 500 mg de calcio elemento (Mastical®, Calcium Sandoz Forte®)

Ca i.v.: ampollas de 10 ml con 100 mg (5 mEq) de calcio (Suplecal®)

Chvostek: percusión por delante del trago y observar contracción de mc faciales.

Trousseau: mantener manguito hinchado por encima de la PAS al menos 2 min. Positivo si espasmo distal (no parestesias).

Amp: ampolla; Ca: calcio; h: horas; i.v.: intravenoso; min: minutos; SG: suero glucosado; tto: tratamiento; v.o.: vía oral

Una vez instaurado el tratamiento se deben monitorizar la clínica y las calcemias 1 ó 2 veces al día hasta comprobar su estabilización, pudiendo ser necesario incrementar las dosis. Conseguida una calcemia estable, debe mantenerse esa dosis durante 1-3 semanas antes de comenzar a descenderla paulatinamente.<sup>46</sup>

## MANEJO A LARGO PLAZO DEL HIPOPARATIROIDISMO POST-TIROIDECTOMÍA

### Recuperación de la función paratiroidea

Hasta un 50% de los pacientes que alcanzan concentraciones normales de PTH, requieren tratamiento para evitar síntomas de hipocalcemia, lo que indica que la PTH a pesar de encontrarse dentro del rango de normalidad, no es suficientemente activa para mantener la calcemia, por lo que la recuperación de la función paratiroidea debe

ser definida no solo por el nivel de concentración de PTH sino también por la necesidad o no de tratamiento.<sup>80</sup> La probabilidad de resolución del hipoPTH-PT prolongado es más alta cuando la calcemia es >9 mg/dL y la concentración de PTH es detectable al mes de la cirugía (4-14pg/mL).<sup>67</sup>

## Tratamiento del hipoparatiroidismo post-tiroidectomía crónico

Los objetivos del tratamiento según las guías clínicas recientes,<sup>3,5</sup> se exponen en la tabla 2.

**Tabla 2:** Objetivos del tratamiento del hipoPTH-PT crónico.<sup>3,5</sup>

| OBJETIVOS                                                                                       | BENEFICIOS                                                |
|-------------------------------------------------------------------------------------------------|-----------------------------------------------------------|
| Evitar síntomas de hipocalcemia                                                                 |                                                           |
| Mantener calcemia entre 8-8,4 mg/dL (2-2,1mM/L)                                                 | Evita hipercalcemia e hipercalciuria                      |
| Mantener la calciuria dentro del rango de referencia (hombres < 300mg/24h; mujeres <250 mg/24h) | Evita aparición de nefrolitiasis y nefrocalcinosis        |
| Mantener la concentración de fosfato sérico dentro del rango de referencia                      | Disminuye el riesgo de calcificaciones extraesqueléticas. |
| Mantener producto calcio x fosfato < 55mg <sup>2</sup> /dL <sup>2</sup>                         |                                                           |
| Mantener magnesio sérico normal                                                                 |                                                           |
| Mantener una concentración de 25OHD > 20 ng/mL                                                  |                                                           |
| Conseguir bienestar y buena calidad de vida                                                     |                                                           |

El tratamiento consiste en la administración de suplementos de calcio y análogos activados de vitamina D por vía oral.<sup>5</sup> La administración de suplementos de calcio debe hacerse en forma de sales de calcio a dosis de 1-2 g/día de calcio elemento (tabla 3) en tomas repartidas, debido a la posible saturación de la capacidad absortiva del intestino a partir de dosis superiores a 500mg por toma. Los suplementos de calcio no deben

administrarse junto con la L-tiroxina debido a la interferencia en la absorción de la hormona. La ingesta de alimentos ricos en calcio (fundamentalmente lácteos), se considera equivalente a la toma de suplementos por lo que es aconsejable una adecuada ingesta diaria de estos productos, ya que pueden contribuir a mantener la calcemia en niveles apropiados.

**Tabla 3:** Contenido en calcio elemento de las sales de calcio.

| SALES DE CALCIO   | CA ELEMENTO |
|-------------------|-------------|
| CARBONATO CÁLCICO | 40%         |
| CITRATO CÁLCICO   | 21%         |

La administración de análogos activados de vitamina D es preferible a la utilización de dosis suprafisiológicas de colecalciferol (vitamina D3), debido a que su corta vida media permite una mejor titulación de la dosis requerida. Puede utilizarse el calcitriol (0,25-2µg/d) o el alfacalcidol (disponible solo en algunos países). El efecto hipercalcémico del calcitriol es superior al del alfacalcidol.

El tratamiento con calcitriol no asegura un adecuado estado de 25-OH-vitamina D (25-OH-D). Teniendo en cuenta que el calciferol puede ser importante para algunos procesos celulares y que puede ser hidroxilado a 1,25(OH)<sub>2</sub>D, reacción catalizada por hidroxilasas de diferentes tejidos, parece razonable mantener unos niveles suficientes de 25-OH-D, además del tratamiento con análogos activados.

El calcio se une al fósforo en el intestino y puede reducir los niveles plasmáticos de fosfato. En cambio, el calcitriol aumenta la absorción de fosfato a nivel intestinal, por lo que en situaciones de hiperfosfatemia puede ser necesario disminuir la dosis de

calcitriol aumentando la dosis de calcio, con objeto de mantener ambos parámetros dentro del rango de referencia. Las comidas procesadas, los refrescos de cola y otras sodas tienen alto contenido en fosfatos, por lo que la restricción de estos productos es recomendable cuando la fosfatemia sea  $>5$  mg/dL.<sup>81</sup> El empleo de quelantes del fósforo puede ser necesario en situación de hiperfosfatemia franca ( $>6,5$ mg/dL).

Tanto la administración de dosis muy elevadas de suplementos de calcio como su asociación con calcitriol pueden producir hipercalcemia. La excreción urinaria de calcio varía en función de varios factores: nivel de PTH, carga de calcio filtrada y balance de sodio, de forma que la excreción de calcio aumenta con niveles altos de excreción de sodio.<sup>82</sup> En este sentido, la restricción de sodio de la dieta puede ayudar a disminuir la hipercalcemia. Por lo tanto, en caso de hipercalcemia se aconseja restringir la ingesta de calcio y de sal, así como asociar diuréticos tiazídicos (inducen un aumento de la reabsorción tubular renal de calcio). La dosis de hidroclorotiazida aconsejada es entre 25-100mg/d. Es necesario en este supuesto vigilar la concentración plasmática de potasio.

### Parathormona

El tratamiento con teriparatide (PTH 1-34) y con PTH intacta (PTH 1-84)<sup>83</sup> ha demostrado ser eficaz en reducir o incluso suprimir el tratamiento con calcio y vitamina D en pacientes con hipoPTH en varios ensayos clínicos, además de disminuir la excreción urinaria de calcio.<sup>71</sup> De igual forma se ha objetivado una mejoría en el remodelado óseo, así como un impacto positivo en la calidad de vida de sujetos adultos con hipoPTH-PT. El tratamiento con PTH 1-84 parece ser el más adecuado ya que

además de ser la forma deficitaria en la enfermedad, tiene una vida media más larga que la PTH1-34, lo que permite su administración en una única dosis diaria.

El tratamiento con rhPTH 1-84 fue aprobado por la FDA en enero de 2015. La EMA concedió en mayo de 2017 la autorización condicional de comercialización para la rhPTH 1-84 (Natpara®) para el tratamiento del hipoPTH crónico. Dado que se ha descrito la aparición de osteosarcoma en ratas tratadas con cualquier forma de rhPTH, su utilización está restringida a aquellos pacientes cuya hipocalcemia no pueda ser controlada mediante el tratamiento con calcio y calcitriol, o que precisen dosis muy elevadas de estos suplementos (superiores a 3g/d de calcio y 2µg/d de calcitriol). La dosis inicial de tratamiento son 50 µg en una única dosis diaria administrada por vía subcutánea en el muslo. Simultáneamente, se debe reducir en un 50% la dosis de vitamina D y realizar controles de calcemia 1-2 veces por semana. La dosis puede ajustarse a una inyección diaria de 25, 75 o 100 µg.<sup>83</sup>

### Seguimiento de la enfermedad

En la figura 2 se indican las recomendaciones de seguimiento clínico, bioquímico y la frecuencia de controles necesarios para un seguimiento correcto de la enfermedad. A pesar de que no existe evidencia sobre los beneficios de la realización de pruebas de imagen para diagnóstico de calcificaciones renales, en pacientes con historia de nefrolitiasis o deterioro de la función renal se recomienda la realización de una ecografía cada 5 años, o con mayor frecuencia en pacientes sintomáticos. La realización de densitometría ósea de forma rutinaria no se aconseja, ya que el hipoPTH no se asocia con disminución de la densidad mineral ósea.

**Figura 2:** Algoritmo de control y tratamiento del hipoPTH-PT crónico.<sup>3</sup>

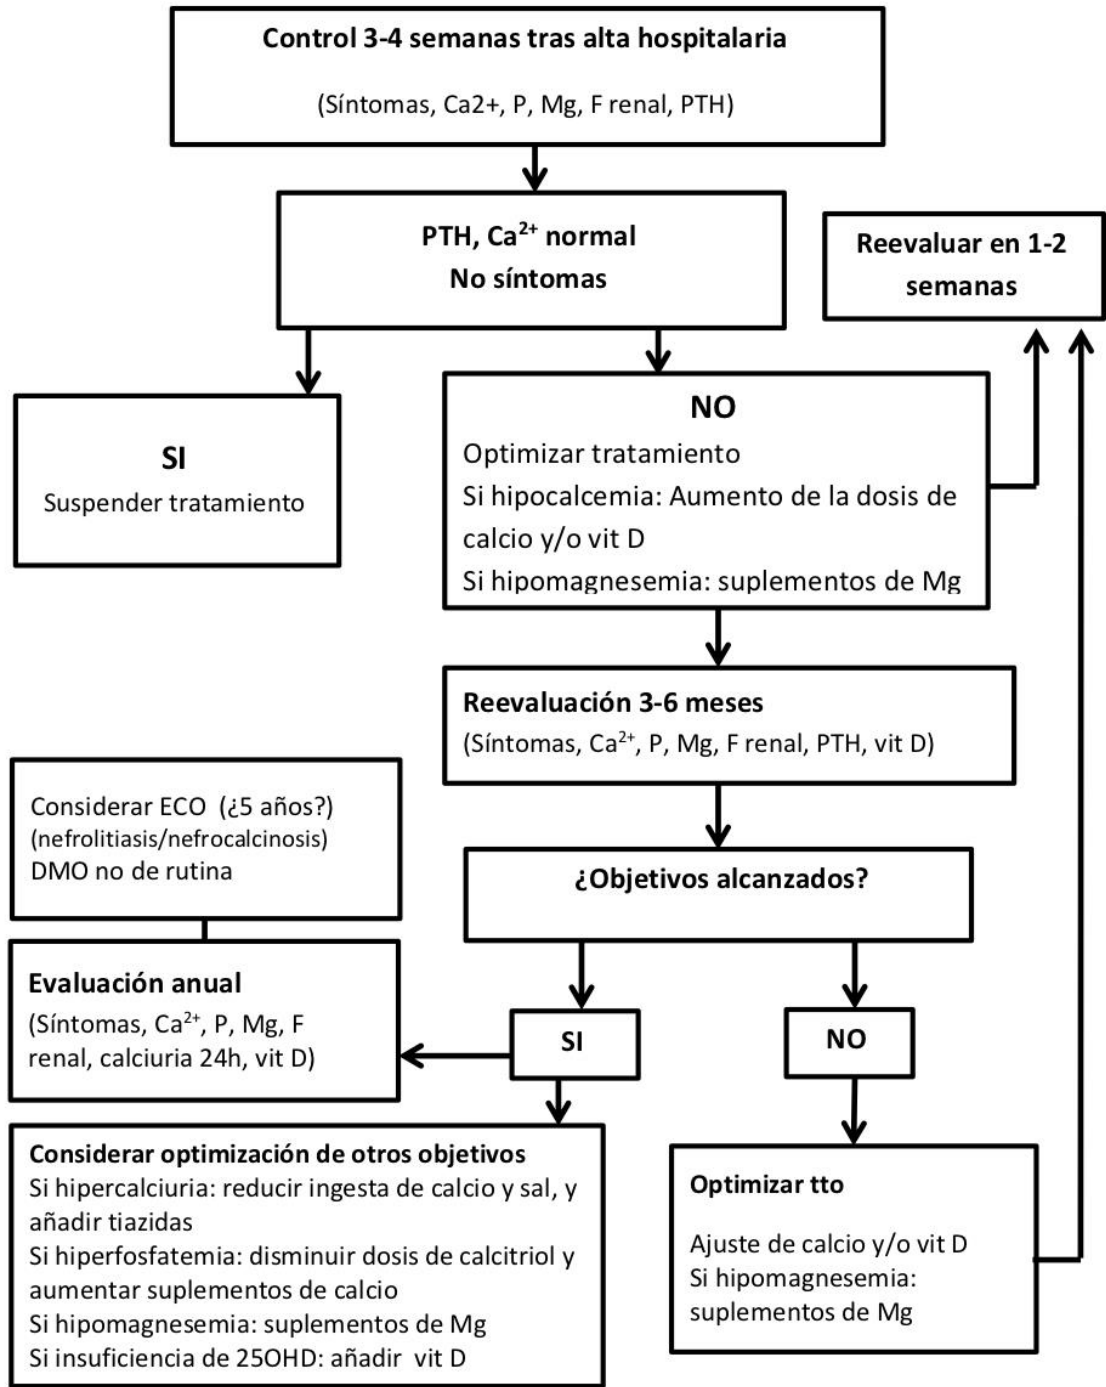

Se ha descrito la recuperación de la función paratiroidea en casos excepcionales a los 2-3 años de la cirugía. Con el fin de evitar la suplementación crónica, debiera determinarse PTH en aquellos casos en los que disminuyera la necesidad de suplementos para mantener los niveles de calcemia dentro del rango adecuado (8-8,4 mg/dL; 2-2,1mM/L).

### Complicaciones crónicas

El hipoPTH mal controlado puede asociarse con varias complicaciones crónicas como: nefrocalcinosis, nefrolitiasis, enfermedad renal crónica, depresión y otras alteraciones neuropsiquiátricas, ansiedad, dolores musculares, alteraciones óseas, calcificaciones extraesqueléticas, cataratas y disminución de la calidad de vida.<sup>84</sup> Sin embargo, los estudios acerca de las comorbilidades de pacientes con hipoPTH-PT son escasos,<sup>85</sup> siendo posible que existan diferencias con otros hipoPTH (congénito, idiopático), relacionadas con la duración de la enfermedad.<sup>86</sup> Es importante mantener un adecuado grado de control para evitar en lo posible el desarrollo de estas alteraciones asociadas.

## BIBLIOGRAFÍA

---

1. Edafe O, Antakia R, Laskar N, Uttley L, Balasubramanian SP. Systematic review and meta-analysis of predictors of post-thyroidectomy hypocalcaemia. *Br J Surg*. 2014;101:307-20.
2. Shoback DM, Bilezikian JP, Costa AG, Dempster D, Dralle H, Khan AA, et al. Presentation of hypoparathyroidism: etiologies and clinical features. *J Clin Endocrinol Metab*. 2016;101:2300-12.
3. Bollerslev J, Rejnmark L, Marcocci C, Shoback DM, Sitges-Serra A, van Biesen W, et al. European Society of Endocrinology Clinical Guideline: Treatment of chronic hypoparathyroidism in adults. *Eur J Endocrinol*. 2015;173:G1-20.
4. Orloff LA, Wiseman SM, Bernet VJ, Fahey TJ, 3rd, Shaha AR, Shindo ML, et al. American Thyroid Association statement on postoperative hypoparathyroidism: diagnosis, prevention, and management in adults. *Thyroid*. 2018;28:830-41.
5. Brandi ML, Bilezikian JP, Shoback D, Bouillon R, Clarke BL, Thakker RV, et al. Management of hypoparathyroidism: summary, statement and guidelines. *J Clin Endocrinol Metab*. 2016;101:2273-83.
6. Mehanna HM, Jain A, Randeva H, Watkinson J, Shaha A. Postoperative hypocalcemia--the difference a definition makes. *Head Neck*. 2010;32:279-83.
7. Lorente-Poch L, Sancho JJ, Munoz-Nova JL, Sanchez-Velazquez P, Sitges-Serra A. Defining the syndromes of parathyroid failure after total thyroidectomy. *Gland Surg*. 2015;4:82-90.
8. Bilezikian JP, Brandi ML, Cusano NE, Mannstadt M, Rejnmark L, Rizzoli R, et al. Management of hypoparathyroidism: present and future. *J Clin Endocrinol Metab*. 2016;101:2313-24.
9. de Andrade Sousa A, Salles JM, Soares JM, de Moraes GM, Carvalho JR, Rocha PR. Course of ionized calcium after thyroidectomy. *World J Surg*. 2010;34:987-92.
10. Lombardi CP, Raffaelli M, Princi P, Dobrinja C, Carrozza C, Di Stasio E, et al. Parathyroid hormone levels 4 hours after surgery do not accurately predict post-thyroidectomy hypocalcemia. *Surgery*. 2006;140:1016-23; discussion 23-5.
11. Dedivitis RA, Aires FT, Cernea CR. Hypoparathyroidism after thyroidectomy: prevention, assessment and management. *Curr Opin Otolaryngol Head Neck Surg*. 2017;25:142-6.
12. Amir A, Sands NB, Tamilia M, Hier MP, Black MJ, Payne RJ. Preoperative serum calcium levels as an indicator of postthyroidectomy hypocalcemia. *J Otolaryngol Head Neck Surg*. 2010;39:654-8.
13. Lang BH, Yih PC, Ng KK. A prospective evaluation of quick intraoperative parathyroid hormone assay at the time of skin closure in predicting clinically relevant hypocalcemia after thyroidectomy. *World J Surg*. 2012;36:1300-6.

14. Tartaglia F, Giuliani A, Sgueglia M, Patrizi G, Di Rocco G, Blasi S, et al. Is ionized calcium a reliable predictor of hypocalcemia after total thyroidectomy? A before and after study. *G Chir.* 2014;35:27-35.
15. Erbil Y, Barbaros U, Temel B, Turkoglu U, Issever H, Bozbora A, et al. The impact of age, vitamin D(3) level, and incidental parathyroidectomy on postoperative hypocalcemia after total or near total thyroidectomy. *Am J Surg.* 2009;197:439-46.
16. Kirkby-Bott J, Markogiannakis H, Skandarajah A, Cowan M, Fleming B, Palazzo F. Preoperative vitamin D deficiency predicts postoperative hypocalcemia after total thyroidectomy. *World J Surg.* 2011;35:324-30.
17. Moriyama T, Yamashita H, Noguchi S, Takamatsu Y, Ogawa T, Watanabe S, et al. Intraoperative parathyroid hormone assay in patients with Graves' disease for prediction of postoperative tetany. *World J Surg.* 2005;29:1282-7.
18. Gonzalez-Sanchez C, Franch-Arcas G, Gomez-Alonso A. Morbidity following thyroid surgery: does surgeon volume matter? *Langenbecks Arch Surg.* 2013;398:419-22.
19. Thomusch O, Machens A, Sekulla C, Ukkat J, Brauckhoff M, Dralle H. The impact of surgical technique on postoperative hypoparathyroidism in bilateral thyroid surgery: a multivariate analysis of 5846 consecutive patients. *Surgery.* 2003;133:180-5.
20. Cho JN, Park WS, Min SY. Predictors and risk factors of hypoparathyroidism after total thyroidectomy. *Int J Surg.* 2016;34:47-52.
21. Lorente-Poch L, Sancho JJ, Ruiz S, Sitges-Serra A. Importance of in situ preservation of parathyroid glands during total thyroidectomy. *Br J Surg.* 2015;102:359-67.
22. Hallgrimsson P, Nordenstrom E, Almquist M, Bergenfelz AO. Risk factors for medically treated hypocalcemia after surgery for Graves' disease: a Swedish multicenter study of 1,157 patients. *World J Surg.* 2012;36:1933-42.
23. Edafe O, Balasubramanian SP. Incidence, prevalence and risk factors for post-surgical hypocalcaemia and hypoparathyroidism. *Gland Surg.* 2017;6:S59-S68.
24. Antakia R, Edafe O, Uttley L, Balasubramanian SP. Effectiveness of preventative and other surgical measures on hypocalcemia following bilateral thyroid surgery: a systematic review and meta-analysis. *Thyroid.* 2015;25:95-106.
25. Yamashita H, Noguchi S, Tahara K, Watanabe S, Uchino S, Kawamoto H, et al. Postoperative tetany in patients with Graves' disease: a risk factor analysis. *Clin Endocrinol (Oxf).* 1997;47:71-7.
26. Testini M, Gurrado A, Avenia N, Bellantone R, Biondi A, Brazzarola P, et al. Does mediastinal extension of the goiter increase morbidity of total thyroidectomy? A multicenter study of 19,662 patients. *Ann Surg Oncol.* 2011;18:2251-9.
27. Noureldine SI, Genther DJ, Lopez M, Agrawal N, Tufano RP. Early predictors of hypocalcemia after total thyroidectomy: an analysis of 304 patients using a short-stay monitoring protocol. *JAMA Otolaryngol Head Neck Surg.* 2014;140:1006-13.

28. Park I, Rhu J, Woo JW, Choi JH, Kim JS, Kim JH. Preserving parathyroid gland vasculature to reduce post-thyroidectomy hypocalcemia. *World J Surg.* 2016;40:1382-9.
29. Testini M, Nacchiero M, Piccinni G, Portincasa P, Di Venere B, Lissidini G, et al. Total thyroidectomy is improved by loupe magnification. *Microsurgery.* 2004;24:39-42.
30. Darr EA, Randolph GW. Management of laryngeal nerves and parathyroid glands at thyroidectomy. *Oral Oncol.* 2013;49:665-70.
31. Shaha AR, Jaffe BM. Parathyroid preservation during thyroid surgery. *Am J Otolaryngol.* 1998;19:113-7.
32. Chang YK, Lang BHH. To identify or not to identify parathyroid glands during total thyroidectomy. *Gland Surg.* 2017;6:S20-S9.
33. Maralcan G, Sayin Z, Baskonu I, Gokalp A, Aybasti N. Does truncal ligation of the inferior thyroid arteries during bilateral subtotal thyroidectomy affect serum calcium levels? A prospective, randomized, controlled study. *Int Surg.* 2006;91:211-6.
34. Barczynski M, Golkowski F, Nawrot I. Parathyroid transplantation in thyroid surgery. *Gland Surg.* 2017;6:530-6.
35. Abboud B, Sleilaty G, Braidy C, Zeineddine S, Ghorra C, Abadjian G, et al. Careful examination of thyroid specimen intraoperatively to reduce incidence of inadvertent parathyroidectomy during thyroid surgery. *Arch Otolaryngol Head Neck Surg.* 2007;133:1105-10.
36. Mitra I, Nichani JR, Yap B, Homer JJ. Effect of central compartment neck dissection on hypocalcaemia incidence after total thyroidectomy for carcinoma. *J Laryngol Otol.* 2011;125:497-501.
37. Wei T, Li Z, Jin J, Chen R, Gong Y, Du Z, et al. Autotransplantation of inferior parathyroid glands during central neck dissection for papillary thyroid carcinoma: a retrospective cohort study. *Int J Surg.* 2014;12:1286-90.
38. Pelizzo MR, Sorgato N, Isabella Merante Boschini I, Marzola MC, Colletti PM, Rubello D. Does the ultrasound dissector improve parathyroid gland preservation during surgery? *Eur J Surg Oncol.* 2014;40:865-8.
39. Grubbs EG, Mittendorf EA, Perrier ND, Lee JE. Gamma probe identification of normal parathyroid glands during central neck surgery can facilitate parathyroid preservation. *Am J Surg.* 2008;196:931-5; discussion 5-6.
40. Benmiloud F, Rebaudet S, Varoquaux A, Penaranda G, Bannier M, Denizot A. Impact of autofluorescence-based identification of parathyroids during total thyroidectomy on postoperative hypocalcemia: a before and after controlled study. *Surgery.* 2018;163:23-30.
41. Di JZ, Zhang HW, Han XD, Zhang P, Zheng Q, Wang Y. Minimally invasive video-assisted thyroidectomy for accidental papillary thyroid microcarcinoma: comparison with conventional open thyroidectomy with 5 years follow-up. *Chin Med J (Engl).* 2011;124:3293-6.

42. Bilezikian JP, Khan A, Potts JT, Jr., Brandi ML, Clarke BL, Shoback D, et al. Hypoparathyroidism in the adult: epidemiology, diagnosis, pathophysiology, target-organ involvement, treatment, and challenges for future research. *J Bone Miner Res.* 2011;26:2317-37.
43. De Sanctis V, Soliman A, Fiscina B. Hypoparathyroidism: from diagnosis to treatment. *Curr Opin Endocrinol Diabetes Obes.* 2012;19:435-42.
44. Shoback D. Clinical practice. Hypoparathyroidism. *N Engl J Med.* 2008;359:391-403.
45. Pérez Arellano JL. Fisiopatología de la glándula paratiroides y del metabolismo de calcio, fósforo y magnesio. In: de Castro S, editor. *Manual de Patología General.* Barcelona: Elsevier Masson; 2013. p. 483-92.
46. Walker Harris V, Jan De Beur S. Postoperative hypoparathyroidism: medical and surgical therapeutic options. *Thyroid.* 2009;19:967-73.
47. Hermann M, Ott J, Promberger R, Kober F, Karik M, Freissmuth M. Kinetics of serum parathyroid hormone during and after thyroid surgery. *Br J Surg.* 2008;95:1480-7.
48. Fehlinger R, Seidel K. The hyperventilation syndrome: a neurosis or a manifestation of magnesium imbalance? *Magnesium.* 1985;4:129-36.
49. Anantharaman V. Hypoglycaemic tetany--a case report. *Singapore Med J.* 1988;29:524-5.
50. Schneider D. Hyperventilation-induced tetany: a case report and brief review of the literature. *Neurol Bull.* 2009;1:11-3.
51. Fahmy FF, Gillett D, Lolen Y, Shotton JC. Management of serum calcium levels in post-thyroidectomy patients. *Clin Otolaryngol Allied Sci.* 2004;29:735-9.
52. Herranz Gonzalez-Botas J, Lourido Piedrahita D. Hipocalcemia posttiroidectomía total: incidencia, control y tratamiento. *Acta Otorrinolaringol Esp.* 2013;64:102-7.
53. Szubin L, Kacker A, Kakani R, Komisar A, Blaugrund S. The management of post-thyroidectomy hypocalcemia. *Ear Nose Throat J.* 1996;75:612-4, 6.
54. Bellantone R, Lombardi CP, Raffaelli M, Boscherini M, Alesina PF, De Crea C, et al. Is routine supplementation therapy (calcium and vitamin D) useful after total thyroidectomy? *Surgery.* 2002;132:1109-13.
55. Roh JL, Park CI. Routine oral calcium and vitamin D supplements for prevention of hypocalcemia after total thyroidectomy. *Am J Surg.* 2006;192:675-8.
56. Singer MC, Bhakta D, Seybt MW, Terris DJ. Calcium management after thyroidectomy: a simple and cost-effective method. *Otolaryngol Head Neck Surg.* 2012;146:362-5.
57. Tartaglia F, Giuliani A, Sgueglia M, Biancari F, Juvonen T, Campana FP. Randomized study on oral administration of calcitriol to prevent symptomatic hypocalcemia after total thyroidectomy. *Am J Surg.* 2005;190:424-9.
58. Alhefdhi A, Mazeh H, Chen H. Role of postoperative vitamin D and/or calcium routine supplementation in preventing hypocalcemia after thyroidectomy: a systematic review and meta-analysis. *Oncologist.* 2013;18:533-42.

59. Sanabria A, Dominguez LC, Vega V, Osorio C, Duarte D. Routine postoperative administration of vitamin D and calcium after total thyroidectomy: a meta-analysis. *Int J Surg*. 2011;9:46-51.
60. Cote V, Sands N, Hier MP, Black MJ, Tamilia M, MacNamara E, et al. Cost savings associated with post-thyroidectomy parathyroid hormone levels. *Otolaryngol Head Neck Surg*. 2008;138:204-8.
61. Payne RJ, Hier MP, Cote V, Tamilia M, MacNamara E, Black MJ. Postoperative parathyroid hormone levels in conjunction with corrected calcium values as a predictor of post-thyroidectomy hypocalcemia: review of outcomes 1 year after the implementation of a new protocol. *J Otolaryngol*. 2005;34:323-7.
62. Australian Endocrine Surgeons Guidelines AES06/01. Postoperative parathyroid hormone measurement and early discharge after total thyroidectomy: analysis of Australian data and management recommendations. *ANZ J Surg*. 2007;77:199-202.
63. Lee DR, Hinson AM, Siegel ER, Steelman SC, Bodenner DL, Stack BC, Jr. Comparison of Intraoperative versus Postoperative Parathyroid Hormone Levels to Predict Hypocalcemia Earlier after Total Thyroidectomy. *Otolaryngol Head Neck Surg*. 2015;153:343-9.
64. Noordzij JP, Lee SL, Bernet VJ, Payne RJ, Cohen SM, McLeod IK, et al. Early prediction of hypocalcemia after thyroidectomy using parathyroid hormone: an analysis of pooled individual patient data from nine observational studies. *Journal of the American College of Surgeons*. 2007;205:748-54.
65. Castro A, Del Rio L, Gavilan J. Stratifying the risk of developing clinical hypocalcemia after thyroidectomy with parathyroid hormone. *Otolaryngol Head Neck Surg*. 2018;158:76-82.
66. Del Rio L, Castro A, Bernaldez R, Del Palacio A, Giraldez CV, Lecumberri B, et al. Valor predictivo de la parathormona en la hipocalcemia posttiroidectomía. *Acta Otorrinolaringol Esp*. 2011;62:265-73.
67. Sitges-Serra A, Ruiz S, Girvent M, Manjon H, Duenas JP, Sancho JJ. Outcome of protracted hypoparathyroidism after total thyroidectomy. *Br J Surg*. 2010;97:1687-95.
68. Marx SJ. Hyperparathyroid and hypoparathyroid disorders. *N Engl J Med*. 2000;343:1863-75.
69. Wang TS, Roman SA, Sosa JA. Postoperative calcium supplementation in patients undergoing thyroidectomy. *Curr Opin Oncol*. 2012;24:22-8.
70. Grober U, Schmidt J, Kisters K. Magnesium in prevention and therapy. *Nutrients*. 2015;7:8199-226.
71. Iglesias P, Diez JJ. Endocrine complications of surgical treatment of thyroid cancer: an update. *Exp Clin Endocrinol Diabetes*. 2017;125:497-505.
72. Khan MI, Waguespack SG, Hu MI. Medical management of postsurgical hypoparathyroidism. *Endocr Pract*. 2011;17 Suppl 1:18-25.
73. Tong GM, Rude RK. Magnesium deficiency in critical illness. *J Intensive Care Med*. 2005;20:3-17.
74. Hurley K, Baggs D. Hypocalcemic cardiac failure in the emergency department. *J Emerg Med*. 2005;28:155-9.
75. Nawrot I, Pragacz A, Pragacz K, Grzesiuk W, Barczynski M. Total thyroidectomy is associated with increased prevalence of permanent hypoparathyroidism. *Med Sci Monit*. 2014;20:1675-81.
76. Reber PM, Heath H, 3rd. Hypocalcemic emergencies. *Med Clin North Am*. 1995;79:93-106.

77. Tohme JF, Bilezikian JP. Hypocalcemic emergencies. *Endocrinol Metab Clin North Am.* 1993;22:363-75.
78. Shah M, Bancos I, Thompson GB, Richards ML, Kasperbauer JL, Clarke BL, et al. Teriparatide therapy and reduced postoperative hospitalization for postsurgical hypoparathyroidism. *JAMA Otolaryngol Head Neck Surg.* 2015;141:822-7.
79. Palermo A, Mangiameli G, Tabacco G, Longo F, Pedone C, Briganti SI, et al. PTH(1-34) for the primary prevention of postthyroidectomy hypocalcemia: the THYPOS trial. *J Clin Endocrinol Metab.* 2016;101:4039-45.
80. Ritter K, Elfenbein D, Schneider DF, Chen H, Sippel RS. Hypoparathyroidism after total thyroidectomy: incidence and resolution. *J Surg Res.* 2015;197:348-53.
81. Shutto Y, Shimada M, Kitajima M, Yamabe H, Saitoh Y, Saitoh H, et al. Inadequate awareness among chronic kidney disease patients regarding food and drinks containing artificially added phosphate. *PLoS One.* 2013;8:e78660.
82. el-Hajj Fuleihan G, Seifter J, Scott J, Brown EM. Calcium-regulated renal calcium handling in healthy men: relationship to sodium handling. *J Clin Endocrinol Metab.* 1998;83:2366-72.
83. Mannstadt M, Clarke BL, Vokes T, Brandi ML, Ranganath L, Fraser WD, et al. Efficacy and safety of recombinant human parathyroid hormone (1-84) in hypoparathyroidism (REPLACE): a double-blind, placebo-controlled, randomised, phase 3 study. *Lancet Diabetes Endocrinol.* 2013;1:275-83.
84. Underbjerg L, Sikjaer T, Rejnmark L. Long-term complications in patients with hypoparathyroidism evaluated by biochemical findings: a case-control study. *J Bone Miner Res.* 2018;33:822-31.
85. Meola A, Vignali E, Matrone A, Cetani F, Marcocci C. Efficacy and safety of long-term management of patients with chronic post-surgical hypoparathyroidism. *J Endocrinol Invest.* 2018;41:1221-6.
86. Underbjerg L, Sikjaer T, Mosekilde L, Rejnmark L. Postsurgical hypoparathyroidism--risk of fractures, psychiatric diseases, cancer, cataract, and infections. *J Bone Miner Res.* 2014;29:2504-10.

## APÉNDICE: RESUMEN DE RECOMENDACIONES

### RECOMENDACIONES PREOPERATORIAS

No se recomienda la administración profiláctica de calcio y vitamina D excepto en los casos con evidencia de déficit preoperatorio.

Se recomienda la realización de la intervención por un equipo quirúrgico experimentado.

Se recomienda vigilancia más estrecha en los pacientes con enfermedad de Graves, en especial si tienen cifras elevadas de fosfatasa alcalina que indiquen riesgo de fenómeno de hueso hambriento postoperatorio.

Se aconseja programar una vigilancia postoperatoria más estrecha en los casos de mayor complejidad quirúrgica, en particular en reintervenciones, bocios voluminosos con extensión intratorácica y disecciones del compartimento central.

### RECOMENDACIONES INTRAOPERATORIAS

Se recomienda la búsqueda e identificación de todas las glándulas paratiroides durante la cirugía.

Se recomienda la identificación y preservación cuidadosa del pedículo vascular.

Se recomienda la valoración del estado de las glándulas paratiroides al finalizar la cirugía, así como el registro detallado de los hallazgos.

Si no se han identificado todas las paratiroides, se recomienda la revisión de la pieza quirúrgica en el campo y el reimplante de las glándulas extirpadas inadvertidamente.

Cuando se realiza una tiroidectomía, se recomienda el reimplante glandular sólo en caso de lesión objetiva o duda de la funcionalidad final de la glándula.

En el caso de vaciamiento ganglionar central bilateral tras tiroidectomía, se recomienda la exéresis y reimplante de, al menos, una glándula paratiroides.

### RECOMENDACIONES PARA EL POSTOPERATORIO INMEDIATO

No se recomienda el empleo postoperatorio rutinario de suplementos de calcio y/o vitamina D en todos los pacientes intervenidos de tiroidectomía total

La tetania franca o la hipocalcemia grave debiera tratarse con calcio intravenoso. La hipocalcemia moderada puede tratarse con preparados de calcio por vía oral y calcitriol. La hipocalcemia leve o la tetania latente puede tratarse con suplementos de calcio oral.

Se recomienda el empleo de PTH para determinar en las primeras horas de postoperatorio el riesgo de desarrollar hipocalcemia clínica. Se aconseja comparar los valores postoperatorios con los preoperatorios, y extraer la muestra en un momento que permita su procesamiento en condiciones óptimas.

Como valor orientativo, aquellos pacientes en los que la variación pre-postoperatoria de PTH sea menor del 80% tienen un riesgo muy bajo de hipocalcemia clínica y pueden ser dados de alta sin suplementos, aunque se recomienda ajustar este umbral según las características de cada centro y cada caso concreto, así como instruir a los pacientes sobre la conducta a adoptar en caso de síntomas de hipocalcemia.

Se debe considerar iniciar tratamiento con suplementos de calcio, con o sin calcitriol, en los pacientes con riesgo de hipocalcemia clínica elevado o indeterminado (descenso de PTH > 80% respecto al valor preoperatorio).

Los pacientes en los que se determine un riesgo muy alto de hipocalcemia sintomática (en general, con una PTH postoperatoria indetectable) deberían iniciar suplementos de calcio oral y calcitriol en las primeras 24 h de postoperatorio.

En los casos en los que se inicie tratamiento con suplementos de calcio con o sin calcitriol, los pacientes deben ser vigilados, y se debe monitorizar la clínica y la calcemia para ajustar las dosis. Se recomienda que esta monitorización se realice en régimen de hospitalización hasta la estabilización de la calcemia, aunque podría realizarse en régimen ambulatorio bajo las condiciones de seguridad adecuadas.

Conseguida una calcemia estable, debe mantenerse esa dosis durante 1-3 semanas antes de comenzar a descenderla paulatinamente

## RECOMENDACIONES PARA EL TRATAMIENTO CRÓNICO

Se recomienda tratar a los pacientes con hipoparatiroidismo **permanente** con sales de calcio oral y calcitriol para mantenerles libres de síntomas y con una calcemia en el límite bajo de la normalidad o ligeramente por debajo de este.

En caso de hipercalcemia se aconseja reducir la ingesta de calcio y restringir la ingesta de sal en la dieta. Puede ser necesario añadir un diurético tipo tiazida al tratamiento.

En pacientes con hiperfosfatemia y/o producto calcio-fósforo elevado, se aconseja realizar intervención sobre la dieta, aumento de las dosis de sales de calcio y reducción de la dosis de calcitriol.

Con el objetivo de mantener un nivel de 25-OH-D adecuado, se recomienda la suplementación con 400-800 U diarias de colecalciferol en los pacientes tratados con calcitriol.

En pacientes con hipomagnesemia es aconsejable utilizar medidas que puedan incrementar los niveles de magnesio.

Una vez alcanzados los objetivos terapéuticos, se recomienda reevaluar la clínica y los parámetros bioquímicos con una periodicidad mínima anual

No se recomienda el uso rutinario de rhPTH
